# Supplementary material for: Interaction between the human papillomavirus 16 E7 oncoprotein and gelsolin ignites cancer cell motility and invasiveness
Source: PubMed Central journal article supplement (PMC5239452; doi:10.18632/oncotarget.8646), 2016-04-08
Supplement: oncotarget-07-50972-s001.pdf [file oncotarget-07-50972-s001.pdf]

## Interaction between the human papillomavirus 16 E7 oncoprotein and gelsolin ignites cancer cell motility and invasiveness

### Supplementary Materials

#### HPV16 E7 expression in three cell lines of cervical carcinoma

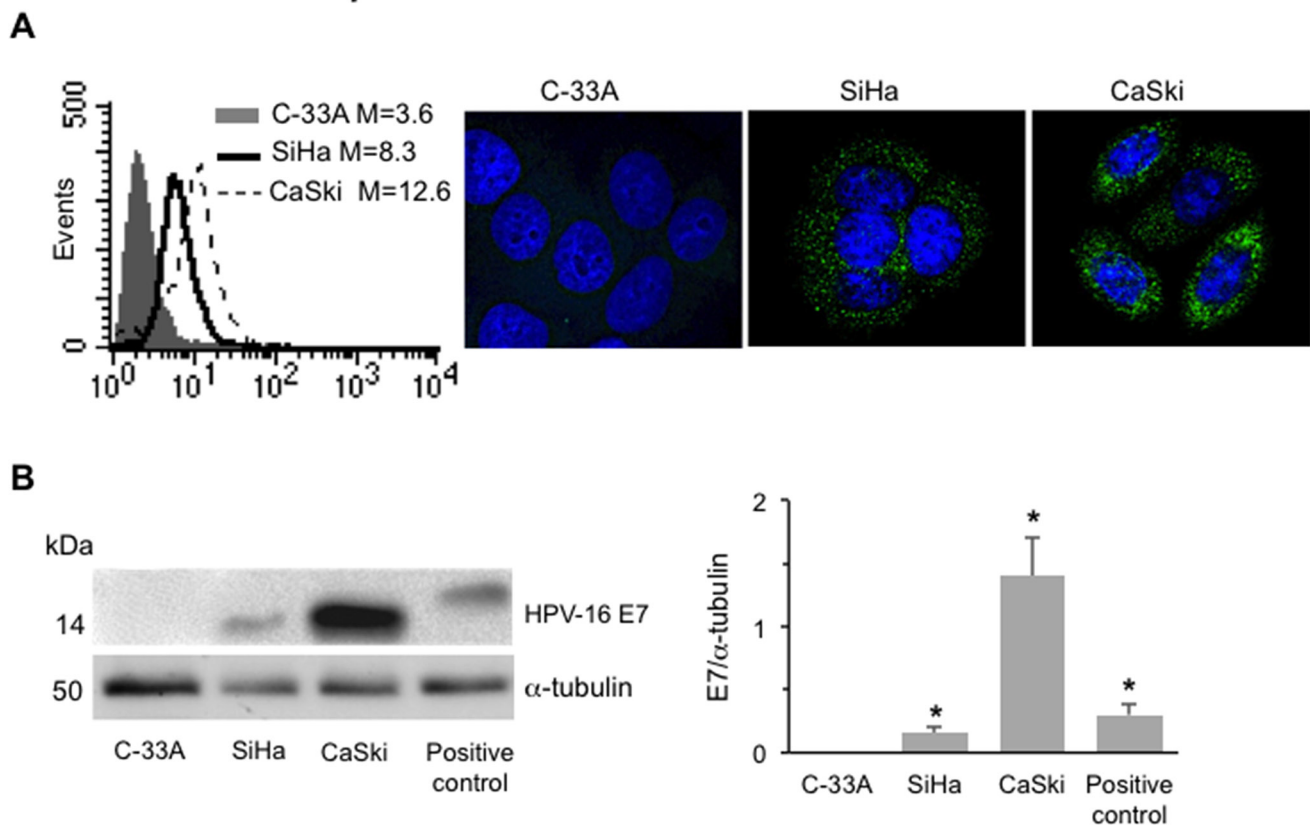

**Supplementary Figure S1: E7 expression in CC cell lines.** (A) *Left panel.* Cytofluorimetric analysis after single cell staining with anti-E7 MAb. Numbers represent the median fluorescence intensity obtained in a representative experiment. *Micrographs.* IVM analysis after anti-E7 MAb/Hoechst double cell staining. Magnification, 1,300 $\times$ . (B) Western blot analysis using an anti-E7 MAb. E7 positive control cells displayed a protein with a higher apparent molecular mass due to the addition of a T7 tag sequence. Loading control was evaluated using anti- $\alpha$ -tubulin MAb. Density of each band in the same gel was analyzed and the densitometric E7/ $\alpha$ -tubulin ratios are shown in the bar graph in the right panel. (\*) indicates  $P < 0.01$  vs. C-33A.

### Experimental set up for differential analyses of transfected and non-transfected cells

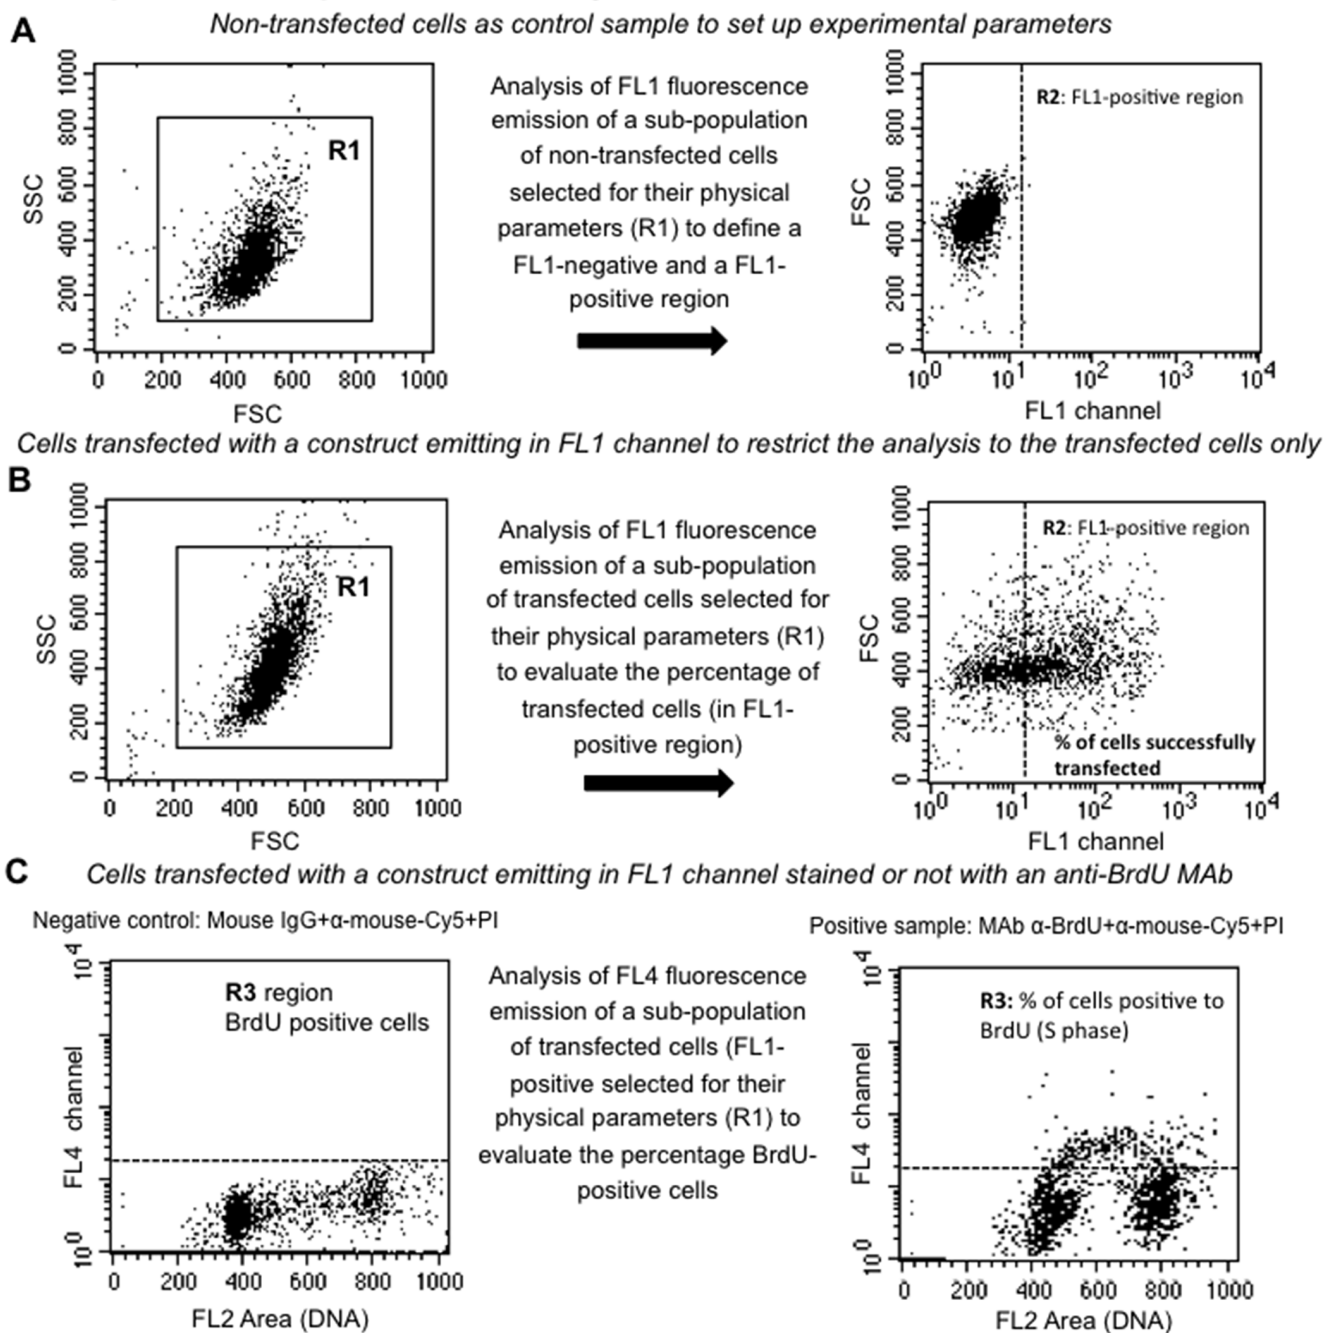

### Supplementary Figure S2: Experimental set up for differential analyses of transfected and non-transfected cells.

Exemplification of a flow cytometry analysis to differentiate transfected and non-transfected cells. (A) *Left panel.* Non-transfected cells were selected on the basis of their physical parameters (R1 region). *Right panel.* Analysis of FL1 fluorescence emission in R1 cells subpopulation to define FL1-negative and FL1-positive (R2) regions. (B) *Left panel.* Selection of a population of transfected cells on the basis of its physical parameters (R1). *Right panel.* FL1 fluorescence emission analysis of cells included in R1 region to quantify the percentage of actually transfected cells on the basis of FL1 negative and positive regions defined in non-transfected cells sample. (C) Seventy-two hours after transfection, cells were incubated with BrdU and then fixed and permeabilized as reported in Material and Methods. After this step, each experimental sample was divided into two: a negative control (IgG1 + anti-mouse Cy5-conjugated + PI) and a positive sample (MAb anti-BrdU + anti-mouse Cy5-conjugated + PI). *Left panel.* Multiparametric analyses of negative control (FL1, FL2 and FL4 fluorescence channels) to distinguish a FL4-negative and a FL4-positive region (R3). *Right panel.* Multiparametric analyses of a positive sample (FL1, FL2 and FL4 fluorescence channels) to evaluate the percentage of cells in FL4-positive region (R3, cells positive to anti-BrdU). Analysis was restricted to FL1 positive (transfected) cells only.

**Control samples of siRNA experiments**

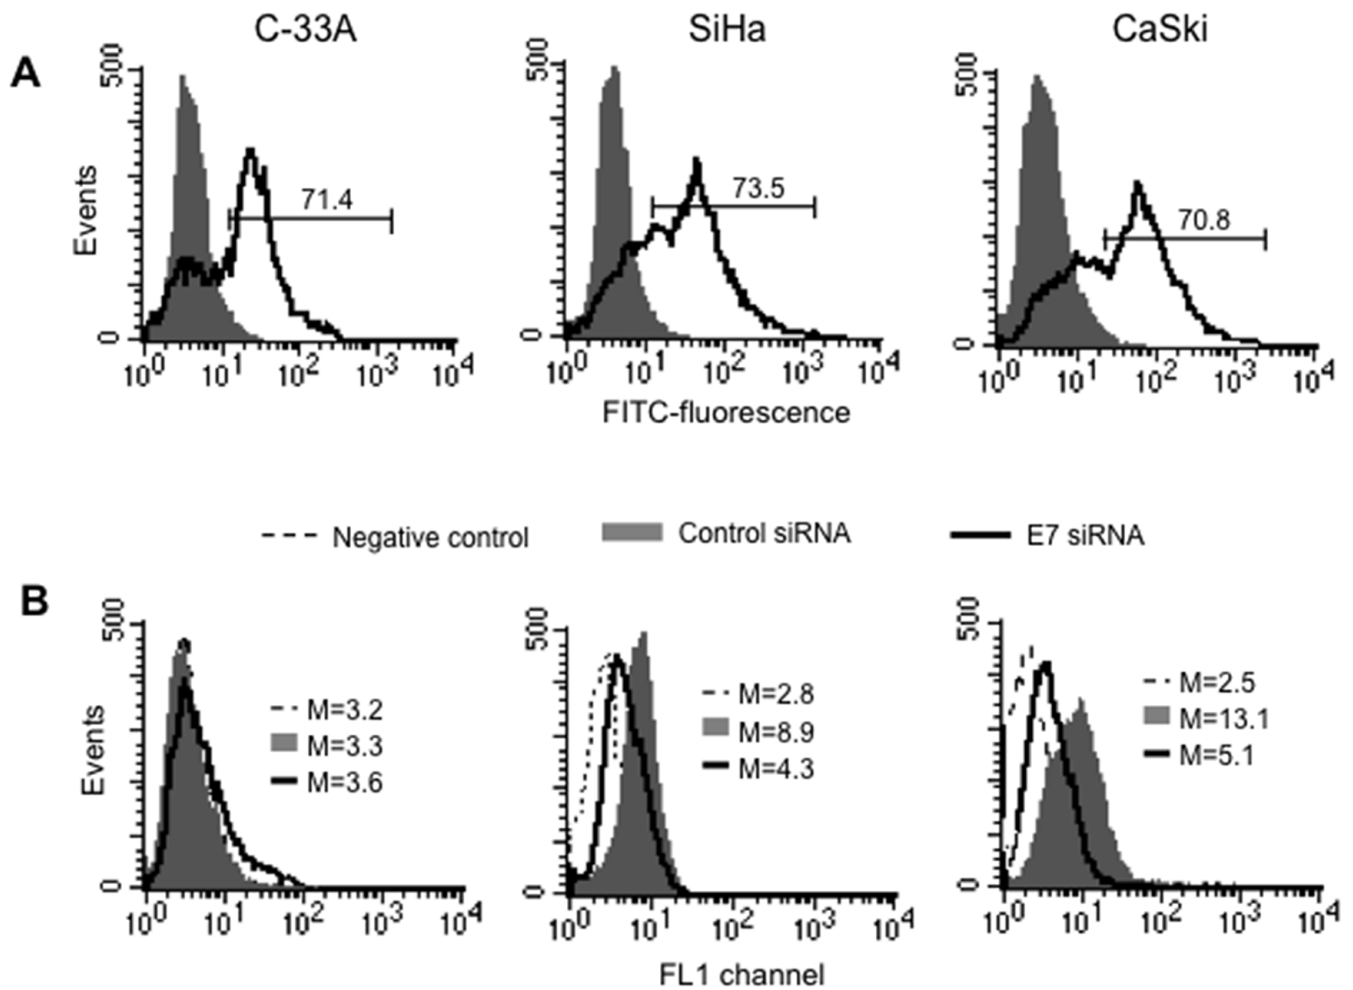

**Supplementary Figure S3: siRNA experiment control samples.** (A) Cytofluorimetric analysis of fluorescence emission in cells transfected with FITC-siRNA. The percentage of FITC-positive cells (corresponding to transfected cells) was considered indicative of the transfection efficiency. (B) Cytofluorimetric evaluation of E7 expression level 48 h after siRNA transfection. The numbers represent the median fluorescence intensity. A representative experiment among three is shown.

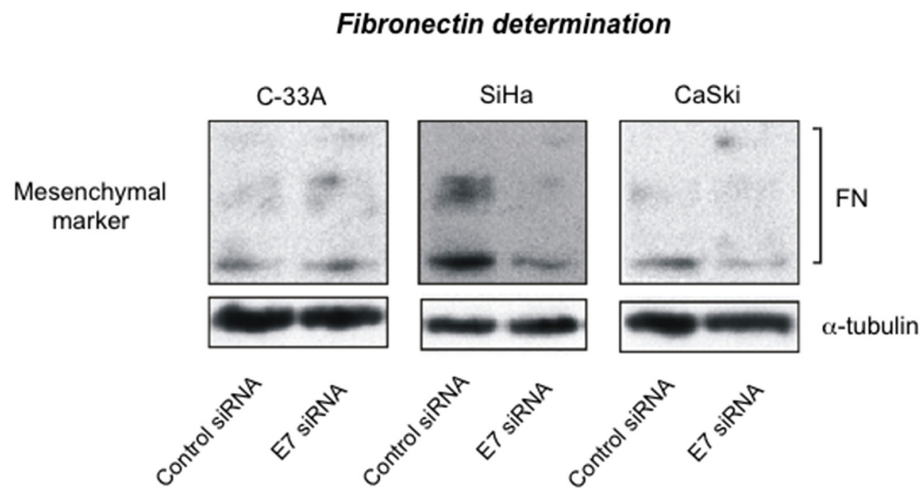

**Supplementary Figure S4: Fibronectin determination in C-33A, SiHa and CaSki cells.** Western blot analysis of fibronectin (FN) on C-33A, SiHa and CaSki cells transfected with control siRNA and E7 siRNA. FN appears as multiple bands, due to transcriptional and post-translational modifications (alternative splicing and glycosylation) of the protein. Loading control was evaluated using an anti- $\alpha$ -tubulin MAb.
